# Supplementary material
Source: MDPI journal article supplement (https://www.mdpi.com/2076-3417/14/6/2439)
Supplement: s1 [file s1]

**SUPPLEMENTARY INFORMATION**

**Table S1.** Exposed bedrock parameters of *LHS* tip.

| Location | Distance<br>from<br>LHS tip<br>(km) | Lithology | Weathering<br>degree    | Fracture<br>frequency<br>(m-3) | Rock strength of Schmidt hammer rebound test<br>(MPa) |      |      |      |      |      |      |      |      |      |
|----------|-------------------------------------|-----------|-------------------------|--------------------------------|-------------------------------------------------------|------|------|------|------|------|------|------|------|------|
| NE wall  | 1.1                                 | Sandstone | Strong                  | 70                             | 23.5                                                  | 25.5 | 27   | 28   | 30   | 31   | 31.5 | 32   | 32.5 | 34   |
|          | 2.5                                 | Sandstone | Strong                  | 55                             | 20.5                                                  | 21   | 24.5 | 24.5 | 29   | 29   | 30   | 32   | 32.5 | 35.5 |
|          | 4.5                                 | Sandstone | Intermediate            | 50                             | 26.5                                                  | 31   | 33   | 36.5 | 37   | 38   | 39   | 39   | 39.5 | 41   |
|          | 6.7                                 | Sandstone | Strong                  | 45                             | 28.5                                                  | 28.5 | 32   | 33.5 | 36.5 | 40   | 41   | 42   | 44   | 45.5 |
|          | 10.1                                | Sandstone | Strong                  | 35                             | 24.5                                                  | 27   | 28.5 | 30.5 | 38.5 | 38.5 | 40.5 | 41   | 41.5 | 43.5 |
|          | 12.6                                | Sandstone | Intermediate-<br>Strong | 30                             | 30.5                                                  | 32   | 35.5 | 36   | 36.5 | 37   | 37.5 | 37.5 | 38.5 | 38.5 |
|          | 13.8                                | Sandstone | Strong                  | 30                             | 34                                                    | 34.5 | 35   | 35   | 36.5 | 38   | 39   | 40   | 42.5 | 42.5 |
|          | 17.1                                | Sandstone | Intermediate-<br>Strong | 25                             | 41.5                                                  | 42   | 42.5 | 43   | 44   | 45.5 | 46.5 | 49   | 49.5 | 50.5 |
|          | 19.5                                | Sandstone | Strong                  | 20                             | 44.5                                                  | 46   | 47.5 | 48.5 | 51.5 | 52   | 52   | 52.5 | 53.5 | 53.5 |
|          | 25.8                                | Sandstone | Intermediate            | 12                             | 49                                                    | 51.5 | 52.5 | 53.5 | 54.5 | 54.5 | 54.5 | 55   | 55   | 56   |
| SW wall  | 0.2                                 | Sandstone | Strong                  | 60                             | 20.5                                                  | 21   | 24.5 | 24.5 | 27   | 29   | 30   | 31   | 32   | 33.5 |
|          | 1.5                                 | Sandstone | Strong                  | 90                             | 26                                                    | 27.5 | 27.5 | 29   | 31   | 31.5 | 32   | 33   | 33.5 | 34   |
|          | 3.3                                 | Sandstone | Strong                  | 70                             | 27.5                                                  | 28.5 | 31   | 33.5 | 34.5 | 34.5 | 35   | 35   | 38   | 39   |
|          | 3.8                                 | Sandstone | Strong                  | 40                             | 32                                                    | 34   | 34   | 35   | 37   | 38.5 | 39   | 42   | 42.5 | 43   |
|          | 4.7                                 | Sandstone | Strong                  | 45                             | 21                                                    | 21   | 21.5 | 21.5 | 22   | 22.5 | 22.5 | 23   | 24   | 25   |
|          | 6.6                                 | Sandstone | Strong                  | 45                             | 30.5                                                  | 30.5 | 35.5 | 36   | 37.5 | 37.5 | 38   | 39   | 43.5 | 44   |
|          | 10.3                                | Sandstone | Intermediate-<br>Strong | 25                             | 41.5                                                  | 42   | 42   | 42.5 | 44   | 44.5 | 45.5 | 46.5 | 46.5 | 47.5 |
|          | 15.1                                | Sandstone | Strong                  | 90                             | 13                                                    | 13.5 | 14.5 | 15   | 15.5 | 15.5 | 16   | 16   | 16.5 | 17   |
|          | 20.8                                | Sandstone | Strong                  | 45                             | 21.5                                                  | 23   | 23.5 | 24.5 | 27   | 27.5 | 30   | 31.5 | 31.5 | 32   |

**Table S2.** Exposed bedrock parameters of *QNS*.

| Location | Distance<br>from<br>QNS<br>(km) | Lithology | Weathering<br>degree    | Fracture<br>frequency<br>(m-3) | Rock strength of Schmidt hammer rebound test<br>(MPa) |      |      |      |      |      |      |      |      |      |
|----------|---------------------------------|-----------|-------------------------|--------------------------------|-------------------------------------------------------|------|------|------|------|------|------|------|------|------|
|          |                                 |           |                         |                                |                                                       |      |      |      |      |      |      |      |      |      |
| NE wall  | 0.3                             | Sandstone | Strong                  | 60                             | 14.5                                                  | 15   | 15.5 | 20   | 20   | 20.5 | 21   | 24   | 25   | 26   |
|          | 0.4                             | Sandstone | Strong                  | 50                             | 22.5                                                  | 22.5 | 24.5 | 25   | 26   | 30   | 33.5 | 34.5 | 37   | 39   |
|          | 0.5                             | Sandstone | Strong                  | 80                             | 15                                                    | 15.5 | 16   | 16   | 20   | 20   | 23   | 23.5 | 25.5 | 30   |
|          | 0.7                             | Sandstone | Strong                  | 100                            | 16.5                                                  | 18   | 18.5 | 20.5 | 21.5 | 21.5 | 22.5 | 22.5 | 25.5 | 25.5 |
|          | 2.3                             | Granite   | Intermediate            | 30                             | 42                                                    | 42.5 | 44   | 45.5 | 48   | 48.5 | 52   | 52.5 | 53   | 54   |
|          | 4.4                             | Granite   | Strong                  | 15                             | 50                                                    | 55   | 57   | 58   | 58.5 | 59   | 59.5 | 60.5 | 60.5 | 61.5 |
|          | 6.3                             | Granite   | Intermediate-<br>Strong | 12                             | 53.5                                                  | 58.5 | 63   | 63.5 | 66   | 66.5 | 66.5 | 67   | 67   | 68   |
|          | 11.5                            | Sandstone | Intermediate-<br>Strong | 40                             | 41.5                                                  | 44   | 45   | 47   | 49   | 49.5 | 50   | 50   | 50.5 | 51   |
|          | 15.7                            | Sandstone | Intermediate-<br>Strong | 15                             | 41                                                    | 40   | 53.5 | 55   | 52.5 | 53.5 | 41   | 46.5 | 45   | 52.5 |
| SW wall  | 1                               | Slate     | Strong                  | >100                           |                                                       |      |      |      |      |      |      |      |      |      |
|          | 1.1                             | Slate     | Strong                  | >100                           | 9.5                                                   | 11   | 11   | 11   | 11.5 | 11.5 | 12   | 12   | 12.5 | 13.5 |
|          | 3.8                             | Slate     | Strong                  | 75                             | 12                                                    | 12.5 | 13   | 13.5 | 13.5 | 13.5 | 14   | 14   | 15.5 | 16   |
|          | 4.2                             | Slate     | Strong                  | 65                             | 19                                                    | 19   | 19   | 19   | 20   | 21.5 | 21.5 | 22.5 | 23   | 24   |
|          | 5.9                             | Slate     | Strong                  | 50                             | 26                                                    | 26.5 | 27   | 27.5 | 28   | 28   | 29   | 32.5 | 35   | 36   |
|          | 8.8                             | Slate     | Strong                  | 40                             | 26.5                                                  | 26.5 | 28.5 | 29.5 | 32   | 37.5 | 40.5 | 43   | 43   | 44   |
|          | 11                              | Slate     | Strong                  | 30                             | 46.5                                                  | 49.5 | 50   | 51   | 53   | 53   | 53.5 | 54   | 54   | 55.5 |
|          | 16                              | Slate     | weak                    | 20                             | 43                                                    | 45.5 | 47.5 | 51   | 51   | 52.5 | 54   | 55   | 58   | 58.5 |
|          | 18.6                            | Slate     | Intermediate-<br>Strong | 12                             | 47                                                    | 49.5 | 51   | 51.5 | 51.5 | 52   | 54   | 55   | 56   | 58   |

**Table S3.** Exposed bedrock parameters of *DFS*.

| Location | Distance<br>from<br>DFS<br>(km) | Lithology | Weathering<br>degree    | Fracture<br>frequency<br>(m-3) | Rock strength of Schmidt hammer rebound test<br>(MPa) |      |      |      |      |      |      |      |      |      |
|----------|---------------------------------|-----------|-------------------------|--------------------------------|-------------------------------------------------------|------|------|------|------|------|------|------|------|------|
|          |                                 |           |                         |                                |                                                       |      |      |      |      |      |      |      |      |      |
| NE wall  | 0.9                             | Slate     | Strong                  | 80                             | 21                                                    | 21.5 | 25   | 25   | 26   | 31.5 | 33   | 33   | 34   | 34   |
|          | 1.4                             | Slate     | Strong                  | 70                             | 13.5                                                  | 15.5 | 16.5 | 19.5 | 20   | 23   | 25.5 | 26.5 | 27.5 | 28.5 |
|          | 3                               | Sandstone | Strong                  | 45                             | 23.5                                                  | 26   | 26.5 | 28.5 | 29.5 | 30   | 30.5 | 31   | 31   | 33   |
|          | 3.5                             | Sandstone | Strong                  | 55                             | 21.5                                                  | 21.5 | 22.5 | 25   | 25   | 25.5 | 28   | 29.5 | 30.5 | 31   |
|          | 4.7                             | Sandstone | Strong                  | 45                             | 25.5                                                  | 31.5 | 32.5 | 32.5 | 32.5 | 33   | 35.5 | 35.5 | 36   | 37   |
|          | 6.1                             | Sandstone | Strong                  | 45                             | 27                                                    | 27   | 27   | 28   | 29   | 29   | 32   | 34   | 34.5 | 37   |
|          | 7.2                             | Sandstone | Strong                  | 40                             | 29.5                                                  | 30   | 31.5 | 31.5 | 32   | 32.5 | 34   | 34   | 34.5 | 35   |
|          | 8.3                             | Sandstone | Strong                  | 30                             | 31.5                                                  | 31.5 | 32   | 36.5 | 37.5 | 39.5 | 41.5 | 42.5 | 43.5 | 44.5 |
|          | 9.1                             | Sandstone | Strong                  | 30                             | 40                                                    | 40.5 | 40.5 | 42.5 | 44   | 45   | 46.5 | 47   | 47.5 | 49.5 |
|          | 10.7                            | Sandstone | Strong                  | 50                             | 37                                                    | 42.5 | 45   | 46.5 | 47   | 51.5 | 51.5 | 52.5 | 53.5 | 56.5 |
|          | 13.5                            | Sandstone | Intermediate            | 25                             | 48                                                    | 52.5 | 54   | 54.5 | 58   | 59.5 | 62.5 | 63.5 | 63.5 | 65   |
| SW wall  | 0.2                             | Slate     | Strong                  | >100                           | 22.5                                                  | 19   | 8.5  | 23   | 12.5 | 23.5 | 16   | 22.5 | 18.5 | 21   |
|          | 0.7                             | Slate     | Strong                  | 60                             | 31                                                    | 21   | 30.5 | 23   | 14   | 19   | 24.5 | 32.5 | 29   | 22.5 |
|          | 1.4                             | Slate     | Strong                  | 50                             | 25                                                    | 25.5 | 25.5 | 28   | 28.5 | 28.5 | 31   | 32   | 32   | 34.5 |
|          | 2.1                             | Slate     | Intermediate-<br>Strong | 50                             | 18.5                                                  | 19   | 19.5 | 20   | 20   | 21   | 21.5 | 23   | 23   | 23.5 |
|          | 3.7                             | Slate     | Strong                  | 50                             | 17                                                    | 17.5 | 19   | 19.5 | 20   | 20   | 21.5 | 23.5 | 23.5 | 24   |
|          | 5.9                             | Sandstone | Strong                  | 60                             | 22                                                    | 22.5 | 24   | 28   | 29   | 30   | 31.5 | 31.5 | 34.5 | 36.5 |
|          | 7                               | Slate     | Strong                  | 30                             | 25.5                                                  | 27.5 | 27.5 | 28   | 28.5 | 29   | 29.5 | 29.5 | 35   | 35.5 |
|          | 10.7                            | Slate     | Strong                  | 30                             | 37                                                    | 40   | 40   | 40.5 | 41   | 43   | 44   | 44   | 45.5 | 46.5 |
|          | 16.2                            | Slate     | Strong                  | 20                             | 37.5                                                  | 39   | 40   | 40   | 40   | 41.5 | 45   | 47.5 | 49.5 | 50.5 |
|          | 19.5                            | Sandstone | Strong                  | 20                             | 46                                                    | 50.5 | 51   | 51   | 52.5 | 52.5 | 53.5 | 54.5 | 55.5 | 55.5 |
|          | 25.8                            | Sandstone | Intermediate            | 15                             | 58.5                                                  | 58.5 | 58.5 | 59.5 | 59.5 | 61.5 | 61.5 | 62   | 62.5 | 62.5 |

**Table S4.** Exposed bedrock parameters of *DFS*.

| Location | Distance<br>from<br>KDS<br>(km) | Lithology | Weathering<br>degree    | Fracture<br>frequency<br>(m-3) | Rock strength of Schmidt hammer rebound test<br>(MPa) |      |      |      |      |      |      |      |      |      |
|----------|---------------------------------|-----------|-------------------------|--------------------------------|-------------------------------------------------------|------|------|------|------|------|------|------|------|------|
|          |                                 |           |                         |                                |                                                       |      |      |      |      |      |      |      |      |      |
| NE wall  | 0.7                             | Sandstone | Strong                  | 60                             | 20                                                    | 21   | 22   | 27   | 29.5 | 35   | 36   | 36   | 36.5 | 37   |
|          | 1                               | Sandstone | Strong                  | 90                             | 11                                                    | 11.5 | 12   | 12.5 | 13   | 15   | 16.5 | 17   | 18.5 | 18.5 |
|          | 1.3                             | Sandstone | Intermediate-<br>Strong | 30                             | 26.5                                                  | 26.5 | 30   | 31.5 | 31.5 | 32.5 | 33.5 | 34   | 34   | 36   |
|          | 1.5                             | Sandstone | Strong                  | 50                             | 31.5                                                  | 31.5 | 31.5 | 32.5 | 32.5 | 33   | 34.5 | 36   | 37   | 38   |
|          | 2.3                             | Sandstone | Intermediate            | 30                             | 28.5                                                  | 28.5 | 29   | 29.5 | 29.5 | 30   | 31   | 35   | 35.5 | 37   |
|          | 3                               | Sandstone | Strong                  | 60                             | 21                                                    | 21   | 23   | 23.5 | 25.5 | 25.5 | 25.5 | 27   | 28   | 32   |
|          | 3.9                             | Sandstone | Strong                  | 45                             | 27.5                                                  | 28   | 28.5 | 29   | 29.5 | 32   | 33.5 | 34   | 34   | 35.5 |
|          | 4.7                             | Sandstone | Strong                  | 40                             | 35                                                    | 35.5 | 36   | 36   | 36.5 | 36.5 | 39   | 39   | 41.5 | 42.5 |
|          | 7.3                             | Sandstone | Intermediate            | 30                             | 32                                                    | 34   | 35.5 | 42   | 42.5 | 43   | 43.5 | 45.5 | 47   | 47.5 |
|          | 9.4                             | Sandstone | Strong                  | 30                             | 39                                                    | 40   | 41   | 41   | 42.5 | 43   | 46   | 47   | 49   | 50   |
|          | 11.4                            | Sandstone | Strong                  | 25                             | 43                                                    | 44.5 | 46   | 46   | 46.5 | 49   | 50   | 50.5 | 51   | 51   |
|          | 15                              | Sandstone | Strong                  | 15                             | 55                                                    | 56.5 | 58   | 59   | 60.5 | 60.5 | 61.5 | 62   | 63   | 65   |
|          | 19                              | Sandstone | Intermediate            | 12                             | 62.5                                                  | 63   | 63.5 | 64   | 67   | 67   | 70   | 70.5 | 70.5 | 71.5 |
| SW wall  | 1.3                             | Slate     | Strong                  | 60                             | 16.5                                                  | 18.5 | 18.5 | 18.5 | 18.5 | 19.5 | 20.5 | 21   | 23   | 23.5 |
|          | 2.8                             | Slate     | Strong                  | 50                             | 28.5                                                  | 29   | 29.5 | 29.5 | 30   | 31   | 35   | 35.5 | 37   | 37.5 |
|          | 4.6                             | Slate     | Intermediate-<br>Strong | 35                             | 27                                                    | 28.5 | 29   | 29.5 | 30   | 30   | 32   | 32   | 32.5 | 33   |
|          | 6.1                             | Slate     | Intermediate            | 40                             | 23.5                                                  | 23.5 | 24   | 24   | 24.5 | 28   | 28.5 | 28.5 | 29   | 32   |
|          | 7.6                             | Slate     | Intermediate            | 40                             | 27                                                    | 29.5 | 29.5 | 31.5 | 32   | 33   | 33   | 38.5 | 40.5 | 41   |
|          | 8.9                             | Sandstone | Strong                  | 30                             | 32                                                    | 35   | 35.5 | 36.5 | 38   | 38.5 | 40   | 42   | 45   | 45.5 |

**Table S5.** Exposed bedrock parameters of *KDS*.

| Location | Distance      | Lithology | Weathering degree   | Fracture frequency (m-3) | Rock strength of Schmidt hammer rebound test (MPa) |      |      |      |      |      |      |      |      |      |
|----------|---------------|-----------|---------------------|--------------------------|----------------------------------------------------|------|------|------|------|------|------|------|------|------|
|          | from KDS (km) |           |                     |                          |                                                    |      |      |      |      |      |      |      |      |      |
| NE wall  | 0.3           | Granite   | Strong              | 65                       | 26.5                                               | 26.5 | 28.5 | 29   | 31   | 31   | 31.5 | 33   | 33   | 33.5 |
|          | 1.1           | Phyllite  | Strong              | 80                       | 16                                                 | 9    | 27   | 12.5 | 15   | 12.5 | 13.5 | 10.5 | 9.5  | 17   |
|          | 1.6           | Phyllite  | Strong              | 50                       | 25                                                 | 25   | 25.5 | 27.5 | 28   | 28.5 | 31   | 33.5 | 34.5 | 34.5 |
|          | 2.4           | Marble    | Intermediate        | 5~10                     | 55.5                                               | 56   | 57   | 57.5 | 58   | 59   | 60.5 | 61   | 63   | 63.5 |
|          | 3.1           | Marble    | Intermediate        | 15                       | 59.5                                               | 62   | 62   | 63   | 65.5 | 66   | 66   | 66.5 | 66.5 | 68   |
|          | 3.9           | Phyllite  | Strong              | 50~60                    | 21                                                 | 24.5 | 26.5 | 27   | 29.5 | 30   | 30   | 30.5 | 31.5 | 36.5 |
|          | 4.2           | Granite   | Intermediate-Strong | 20                       | 49                                                 | 49.5 | 50.5 | 51   | 52   | 52   | 52.5 | 53   | 55   | 55   |
|          | 5.2           | Granite   | Intermediate        | 5~10                     | 51                                                 | 51.5 | 53.5 | 55.5 | 56.5 | 57.5 | 58   | 58.5 | 60.5 | 61   |
|          | 7             | Granite   | Intermediate        | 30                       | 48                                                 | 49   | 51   | 53   | 54   | 56   | 57.5 | 58   | 60   | 61   |
|          | 9.8           | Granite   | Intermediate        | 12~15                    | 52.5                                               | 53.5 | 55   | 55.5 | 56.5 | 58   | 58   | 58.5 | 59.5 | 62.5 |
|          | 12.7          | Granite   | weak                | 10                       | 49.5                                               | 57   | 58   | 60   | 60   | 60.5 | 63   | 64   | 64   | 68   |
|          | 17.3          | Granite   | Fresh               | 5                        | 52                                                 | 53.5 | 62.5 | 64.5 | 69   | 70   | 70.5 | 70.5 | 72   | 76   |
| SW wall  | 0.6           | Granite   | Full                | >100                     | 29                                                 | 31   | 31.5 | 33.5 | 34   | 34   | 34.5 | 37.5 | 38.5 | 42   |
|          | 2.3           | Granite   | Intermediate        | 50                       | 47.5                                               | 49   | 51   | 51.5 | 54   | 55.5 | 57.5 | 58   | 61   | 61   |
|          | 3.2           | Granite   | Intermediate        | 15                       | 35                                                 | 37   | 37.5 | 38   | 46.5 | 48.5 | 52   | 52   | 52.5 | 56   |
|          | 4.5           | Granite   | Intermediate        | 45                       | 43                                                 | 46.5 | 51.5 | 51.5 | 55   | 56.5 | 56.5 | 59   | 59.5 | 60.5 |
|          | 5.1           | Granite   | Intermediate-Strong | 15                       | 47                                                 | 49   | 52   | 54   | 62   | 65   | 66   | 69   | 69   | 69   |
|          | 6.1           | Granite   | Intermediate-Strong | 12~15                    | 27.5                                               | 30   | 31.5 | 33.5 | 34   | 35   | 40   | 42   | 42.5 | 51   |
|          | 8             | Granite   | Intermediate-Strong | 30                       | 21                                                 | 22.5 | 29   | 30.5 | 33.5 | 35   | 35.5 | 36   | 36   | 39   |
|          | 9             | Granite   | Strong              | 50                       | 35                                                 | 36   | 36   | 36.5 | 46   | 51   | 52   | 52.5 | 54   | 54.5 |
|          | 10.3          | Granite   | weak                | 20                       | 42                                                 | 44   | 45   | 47   | 49.5 | 52   | 52.5 | 55   | 56   | 57   |
|          | 16.1          | Sandstone | Intermediate        | 30                       | 55                                                 | 60   | 60   | 60.5 | 61.5 | 62   | 63   | 64.5 | 66   | 66.5 |
